# Supplementary material for: Causal effects of fatty acids on atopic dermatitis: A Mendelian randomization study
Source: Front Nutr. 2023 Feb 23;10:1083455. doi: 10.3389/fnut.2023.1083455 (PMC9996175; doi:10.3389/fnut.2023.1083455)
Supplement: Supplementary file 1 [file Table_1.XLSX]

## Sheet: n-3
F statistics of Omega-3 fatty acids instruments.
SNP	R2	F
rs174564	0.051497	6243.53
rs261290	0.00591589	684.358
rs58542926	0.00405792	468.55
rs112875651	0.00363998	420.116
rs1260326	0.00322116	371.621
rs964184	0.00313285	361.401
rs633695	0.00291998	336.772
rs72789541	0.002741	316.073
rs1167998	0.00233279	268.891
rs62466318	0.00169091	194.779
rs673335	0.00120518	138.759
rs182611493	0.0010859	125.011
rs9304381	0.000831227	95.6682
rs4860987	0.000823773	94.8095
rs12226389	0.000774963	89.1876
rs139974673	0.000702903	80.8886
rs77960347	0.000683566	78.6618
rs2394976	0.000577081	66.4009
rs10455872	0.000576704	66.3575
rs9987289	0.000531061	61.1029
rs629301	0.000506358	58.2591
rs3018731	0.000506118	58.2316
rs143355652	0.000492155	56.6242
rs117733303	0.000488535	56.2075
rs10184054	0.000454373	52.2753
rs16940904	0.000442393	50.8964
rs6882345	0.000387699	44.6015
rs55891451	0.000376379	43.2988
rs1132899	0.00036662	42.1757
rs737338	0.000358485	41.2395
rs3129962	0.000347083	39.9274
rs4000713	0.000345753	39.7743
rs117143374	0.000335831	38.6326
rs7819706	0.000327852	37.7143
rs6601924	0.000320696	36.8909
rs1800978	0.000302907	34.844
rs34663616	0.000302117	34.753
rs7970695	0.000301534	34.686
rs6129624	0.000295777	34.0235
rs11242109	0.000288985	33.242
rs7924036	0.000272655	31.3631
rs6693447	0.000261778	30.1115
rs11681659	0.000256484	29.5025
rs13424225	0.000242331	27.8741
rs144018203	0.000241939	27.8289
rs11563251	0.000240627	27.678
rs1672811	0.000238811	27.4691
rs35135293	0.000217884	25.0615

## Sheet: n-6
F statistics of Omega-6 fatty acids instruments.
SNP	R2	F
rs964184	0.00444269	513.176
rs261290	0.0042151	486.775
rs1002687	0.00379108	437.621
rs58542926	0.00225809	260.262
rs633695	0.0021759	250.768
rs77960347	0.00198345	228.545
rs1260326	0.00197509	227.579
rs112875651	0.00193443	222.885
rs142158911	0.00183733	211.676
rs183130	0.00165772	190.949
rs9304381	0.00146601	168.835
rs672889	0.00140457	161.748
rs9295128	0.00127641	146.971
rs1461729	0.00126509	145.666
rs12740374	0.00112866	129.939
rs4704210	0.00102269	117.726
rs2740488	0.000979879	112.794
rs6882345	0.000935928	107.73
rs55747707	0.000794247	91.4086
rs6938647	0.000790107	90.9317
rs1081105	0.000757919	87.2245
rs28383314	0.000709216	81.6156
rs56322906	0.000683463	78.6499
rs6547409	0.00064368	74.0689
rs13108218	0.000585344	67.3522
rs79429216	0.00057108	65.71
rs4299376	0.000548403	63.0994
rs115478735	0.000535212	61.5807
rs1883711	0.000514331	59.1769
rs870526	0.000507597	58.4018
rs72997616	0.000453152	52.1348
rs11789603	0.00044468	51.1596
rs7139079	0.000427038	49.129
rs7707394	0.000399857	46.0008
rs6471717	0.0003765	43.3127
rs114863007	0.000358029	41.187
rs3817335	0.000350942	40.3715
rs534417	0.000333385	38.3511
rs1800961	0.00032465	37.3459
rs6602911	0.000305552	35.1483
rs2737245	0.000303462	34.9079
rs4860948	0.000287603	33.083
rs3734854	0.000275424	31.6817
rs9616847	0.000269567	31.0078
rs3770586	0.00026348	30.3074
rs75406471	0.000257969	29.6733
rs740516	0.000255756	29.4187
rs7750288	0.000253121	29.1156
rs4439799	0.000251386	28.9159
rs6934962	0.00025019	28.7783
rs141469619	0.000245339	28.2202

## Sheet: PUFA
F statistics of Polyunsaturated fatty acids instruments.
SNP	R2	F
rs261290	0.00570391	659.695
rs964184	0.0051918	600.157
rs102275	0.00431587	498.463
rs1002687	0.00422134	487.499
rs58542926	0.00319719	368.846
rs633695	0.00290861	335.457
rs112875651	0.00284693	328.324
rs1260326	0.00278239	320.859
rs77960347	0.00200418	230.938
rs142158911	0.00175474	202.144
rs9304381	0.00161918	186.503
rs183130	0.0013725	158.05
rs9295128	0.00136539	157.23
rs672889	0.00134889	155.327
rs1461729	0.00133521	153.75
rs55747707	0.00121384	139.757
rs12740374	0.00119661	137.771
rs6882345	0.000970294	111.689
rs2740488	0.000942386	108.474
rs3843482	0.000845235	97.2817
rs6938647	0.000768666	88.4623
rs28383314	0.000766713	88.2373
rs56322906	0.000740072	85.169
rs72997616	0.000714123	82.1807
rs6547409	0.000696822	80.1883
rs13108218	0.000557277	64.121
rs1883711	0.000525865	60.5048
rs870526	0.000517256	59.5137
rs7970695	0.00049813	57.312
rs11789603	0.000441531	50.7972
rs4299376	0.00043469	50.0098
rs4860948	0.00042099	48.433
rs34955778	0.000420105	48.3311
rs115478735	0.000417919	48.0795
rs114863007	0.000395431	45.4914
rs2326077	0.00036162	41.6003
rs6602911	0.000358968	41.295
rs2737245	0.000326751	37.5876
rs534417	0.000325914	37.4914
rs75406471	0.000324566	37.3362
rs7707394	0.00032326	37.186
rs141469619	0.00031442	36.1687
rs115413710	0.000308941	35.5383
rs1800961	0.000301245	34.6527
rs4561509	0.000286032	32.9022
rs3770586	0.00028523	32.81
rs59774409	0.000279011	32.0944
rs4986970	0.000267238	30.7397
rs3822855	0.000266972	30.7092
rs9616847	0.00026083	30.0025
rs10096633	0.000249946	28.7502
rs73013176	0.000232088	26.6956
rs2229738	0.000207621	23.8808

## Sheet: SFA
F statistics of saturated fatty acids instruments.
SNP	R2	F
rs11620783	0.000234957	27.0257
rs1890896	0.000236344	27.1853
rs10810374	0.000248571	28.592
rs2000999	0.000252475	29.0411
rs10884966	0.000263298	30.2864
rs60960031	0.000299986	34.5078
rs12263369	0.00030754	35.377
rs7551124	0.000310209	35.6842
rs6602911	0.0003112	35.7982
rs6847980	0.000324117	37.2845
rs7118569	0.000328063	37.7387
rs11895352	0.000338906	38.9864
rs11429307	0.000347534	39.9792
rs11789603	0.000351717	40.4606
rs12740374	0.000354225	40.7492
rs10504255	0.000356252	40.9825
rs13108218	0.000357165	41.0876
rs918106	0.000357993	41.1829
rs117488242	0.000368639	42.408
rs632057	0.000387243	44.5491
rs1883711	0.000387464	44.5745
rs7979473	0.000401672	46.2096
rs1128249	0.000414724	47.7118
rs139974673	0.000443561	51.0309
rs739320	0.000447119	51.4403
rs11076175	0.000459763	52.8956
rs102275	0.000487292	56.0645
rs56322906	0.000513007	59.0246
rs141469619	0.000514739	59.2239
rs2740488	0.000532951	61.3205
rs2126259	0.00061358	70.6031
rs4704834	0.000670384	77.1438
rs28383314	0.000719684	82.8212
rs12151108	0.000728913	83.8839
rs2156552	0.000774279	89.1087
rs4564803	0.00085576	98.4941
rs77960347	0.00105299	121.219
rs139315015	0.00126881	146.095
rs3812316	0.00156087	179.776
rs58542926	0.00188301	216.95
rs117733303	0.00213816	246.409
rs633695	0.00218286	251.571
rs10455872	0.00268551	309.657
rs1002687	0.00309699	357.251
rs261290	0.00464538	536.698
rs964184	0.00481721	556.646
rs1260326	0.00535919	619.611

## Sheet: MUFA
F statistics of monounsaturated fatty acids instruments.
SNP	R2	F
rs1002687	0.00380257	438.953
rs10455872	0.00322365	371.909
rs1052248	0.000385509	44.3494
rs1128249	0.000593944	68.3424
rs11429307	0.000564287	64.9279
rs116843064	0.00103506	119.152
rs117733303	0.00250642	288.955
rs11895352	0.000318249	36.6093
rs11940694	0.000308583	35.497
rs1260326	0.00584708	676.351
rs12916	0.000261283	30.0546
rs13108218	0.00067132	77.2516
rs1394092	0.000385255	44.3203
rs139974673	0.000739701	85.1263
rs141469619	0.00117631	135.431
rs142385484	0.000324819	37.3654
rs1471251	0.000434324	49.9676
rs149615216	0.000608554	70.0245
rs1540037	0.000400951	46.1266
rs174564	0.00187833	216.409
rs182611493	0.000490608	56.4461
rs1890896	0.000231747	26.6564
rs2000999	0.000278616	32.0489
rs2035816	0.00025883	29.7723
rs2081687	0.00029998	34.5072
rs2478236	0.000309891	35.6475
rs261290	0.00246148	283.761
rs2740488	0.000316297	36.3847
rs28752924	0.000446945	51.4203
rs2943635	0.000296095	34.0601
rs3198697	0.000358792	41.2749
rs328	0.00368507	425.34
rs3812316	0.00289958	334.413
rs4564803	0.00180919	208.429
rs4704834	0.000897991	103.359
rs534417	0.000321726	37.0095
rs58542926	0.00190553	219.548
rs602633	0.000258949	29.7861
rs60960031	0.000327834	37.7123
rs615632	0.000534589	61.509
rs62222988	0.000248976	28.6386
rs632057	0.000466724	53.697
rs633695	0.00128787	148.292
rs6606725	0.00030929	35.5784
rs67981690	0.000261527	30.0826
rs6938550	0.000263925	30.3586
rs7140110	0.000380662	43.7916
rs72555385	0.000349148	40.165
rs739320	0.000386349	44.4461
rs7679	0.000409506	47.1113
rs76895963	0.000314731	36.2045
rs77697917	0.000248941	28.6345
rs7979473	0.000273145	31.4194
rs9271573	0.000913094	105.099
rs964184	0.00965822	1121.5
rs998584	0.000245582	28.2481
